# Supplementary material for: Efficacy of Probiotic Compounds in Relieving Constipation and Their Colonization in Gut Microbiota
Source: MDPI journal article supplement (doi:10.3390/molecules27030666), 2022-01-20
Supplement: s1 [file s1]

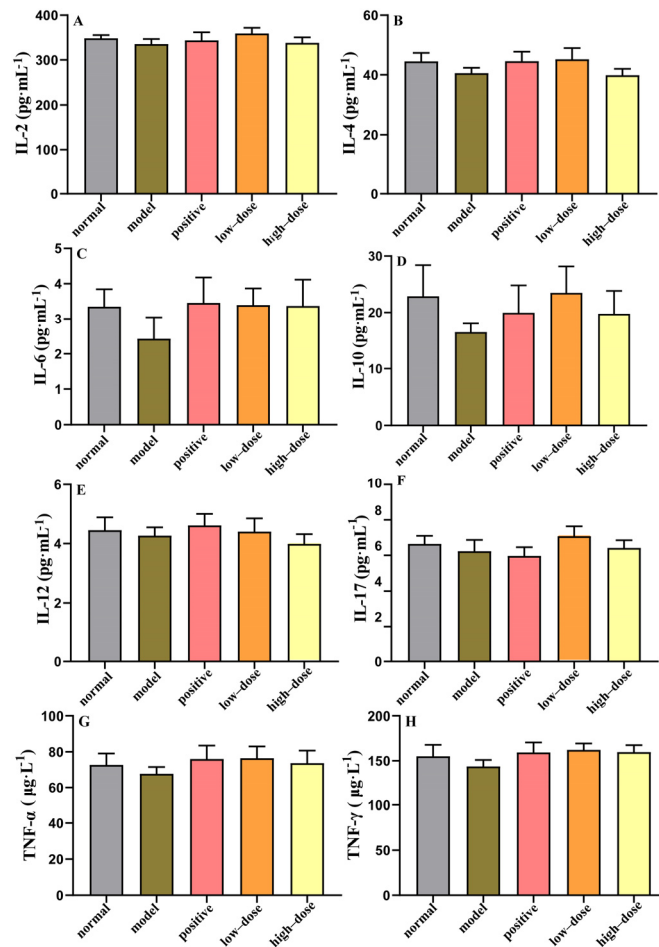

**Figure S1.** Effect of probiotic compounds on serum cytokines in a mouse model of constipation, (A)IL-2. (B) IL- 4. (C) IL-6. (D) IL-10. (E) IL-12. (F) IL-17. (G) TNF- $\alpha$ . (H) TNF- $\gamma$ . Data are means with SEM; a-d: Different letters indicate significant differences ( $P < 0.05$ ), and the same letters and no letters have no difference significance.

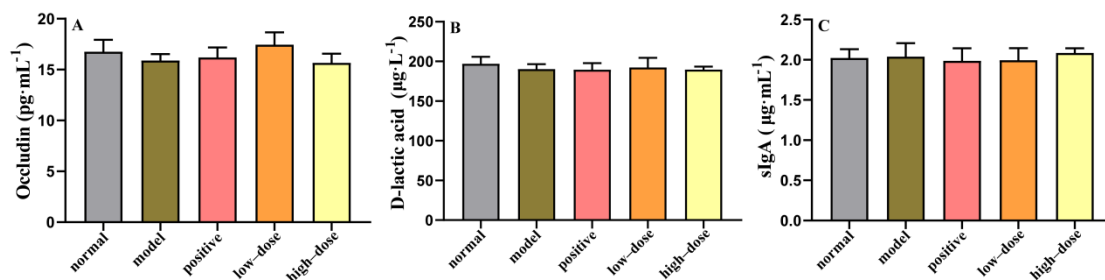

**Figure S2.** Effect of probiotic compounds on serum indexes in a mouse model of constipation. (A) Occludin. (B) D-lactic acid. (C) sIgA. Data are means with SEM; a-d: Different letters indicate significant differences ( $P < 0.05$ ), and the same letters and no letters have no difference significance.

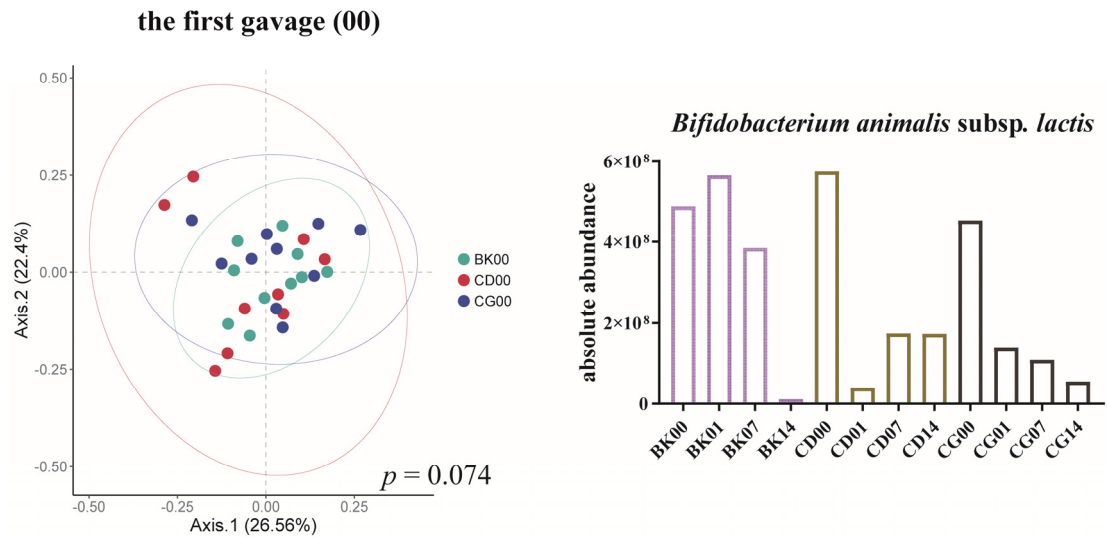

**Figure S3.** Principal component analysis based on Bray-Curtis distance matrices showed difference in the  $\beta$ -diversity of the gut microbiome at the first gavage and the absolute abundance of the *Bifidobacterium animalis* subsp. *lactis*.

| Component           | Amount ( $\mu$ L ) |
|---------------------|--------------------|
| Taq mix             | 25                 |
| 341F                | 1.5                |
| 806R                | 1.5                |
| DNA                 | 2                  |
| dd H <sub>2</sub> O | 20                 |

**Table S1:** Bacterias 16S rRNA V3-V4 50  $\mu$  L PCR reaction system. PCR condition: 95 $^{\circ}$ C 5 min, 95  $^{\circ}$ C 30 s, 52  $^{\circ}$ C 30 s, 72  $^{\circ}$ C 30s, 30 cycles, 72  $^{\circ}$ C 10 min, 12 $^{\circ}$ C 10 min.
